# Supplementary material for: A new method for modeling coalescent processes with recombination
Source: PubMed Central journal article supplement (PMC4137079; doi:10.1186/1471-2105-15-273), 2014-08-11

Mutation

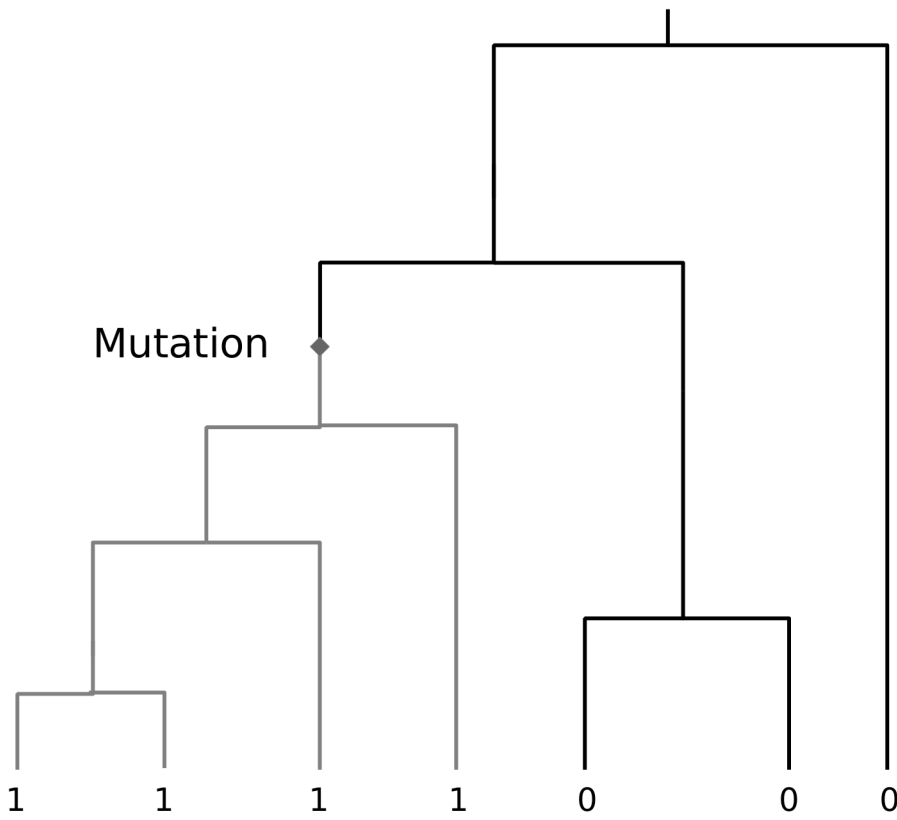

Supplement: 12859_2014_6539_MOESM1_ESM.pdf [file 12859_2014_6539_MOESM1_ESM.pdf]
